# Supplementary material
Source: PubMed Central journal article supplement (PMC2685650)
Supplement: C900037200_1.pdf [file C900037200_1.pdf]

| <b>Data collection</b>               |                                  |
|--------------------------------------|----------------------------------|
| Wavelength, Å                        | 1.0                              |
| Space group                          | P4 <sub>1</sub> 2 <sub>1</sub> 2 |
| Cell parameters                      | a = b = 91.9 Å                   |
|                                      | c = 65.59 Å                      |
|                                      | α = β = γ = 90°                  |
| Resolution, Å                        | 60-2.4 (2.46-2.4)                |
| No. unique reflections               | 10,733                           |
| Redundancy                           | 6.2 (3.9)                        |
| Completeness, %                      | 98.3 (97.1)                      |
| Mean I/σ(I)                          | 15.6 (3.5)                       |
| R <sub>sym</sub> %                   | 9.5 (52.4)                       |
| <b>Refinement</b>                    |                                  |
| R <sub>work</sub> /R <sub>free</sub> | 0.193/0.258                      |
| Mean B-value, Å <sup>2</sup>         | 23.27                            |
| Rmsd bond-length, Å                  | 0.016                            |
| Rmsd bond-angle, °                   | 1.49                             |

The values in parentheses refer to the highest resolution shell.

$R_{sym} = \sum_i |I_i - \langle I \rangle| / \sum_i I_i$ . Where  $I_i$  is the mean of the  $i$  reflexions and  $\langle I \rangle$  is

the average intensity of all  $i_i$  reflexions.

$R_{work} = \sum |F_o| - |F_c| / \sum |F_o|$ .

5% of reflections have been used for  $R_{free}$  calculations.

**Stable1. Statistics for crystallographic data collection and refinement.**

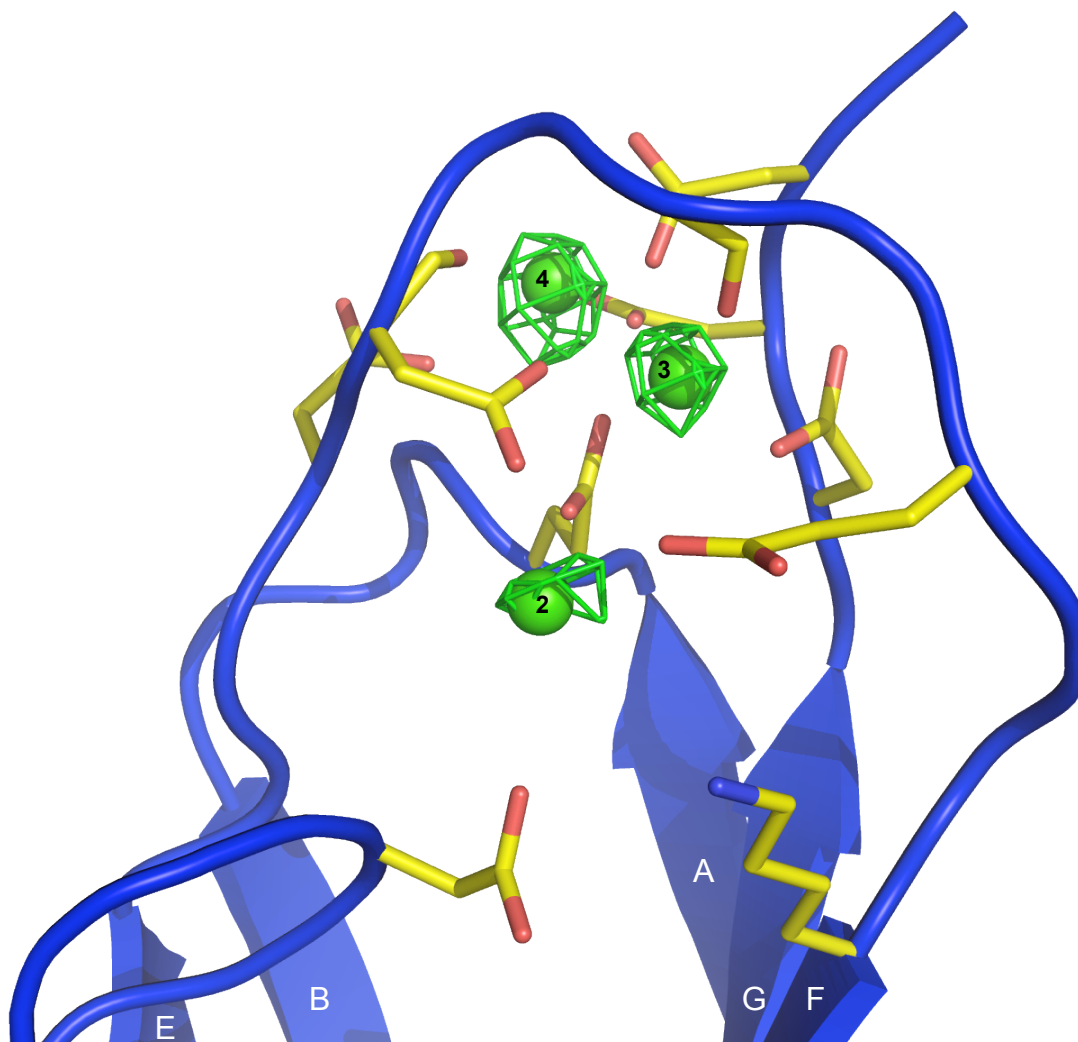

**Sfig1. Fo-Fc electron density contoured at  $4.5\sigma$  of E454K-CBD1 with omitted  $\text{Ca}^{2+}$  ions.**

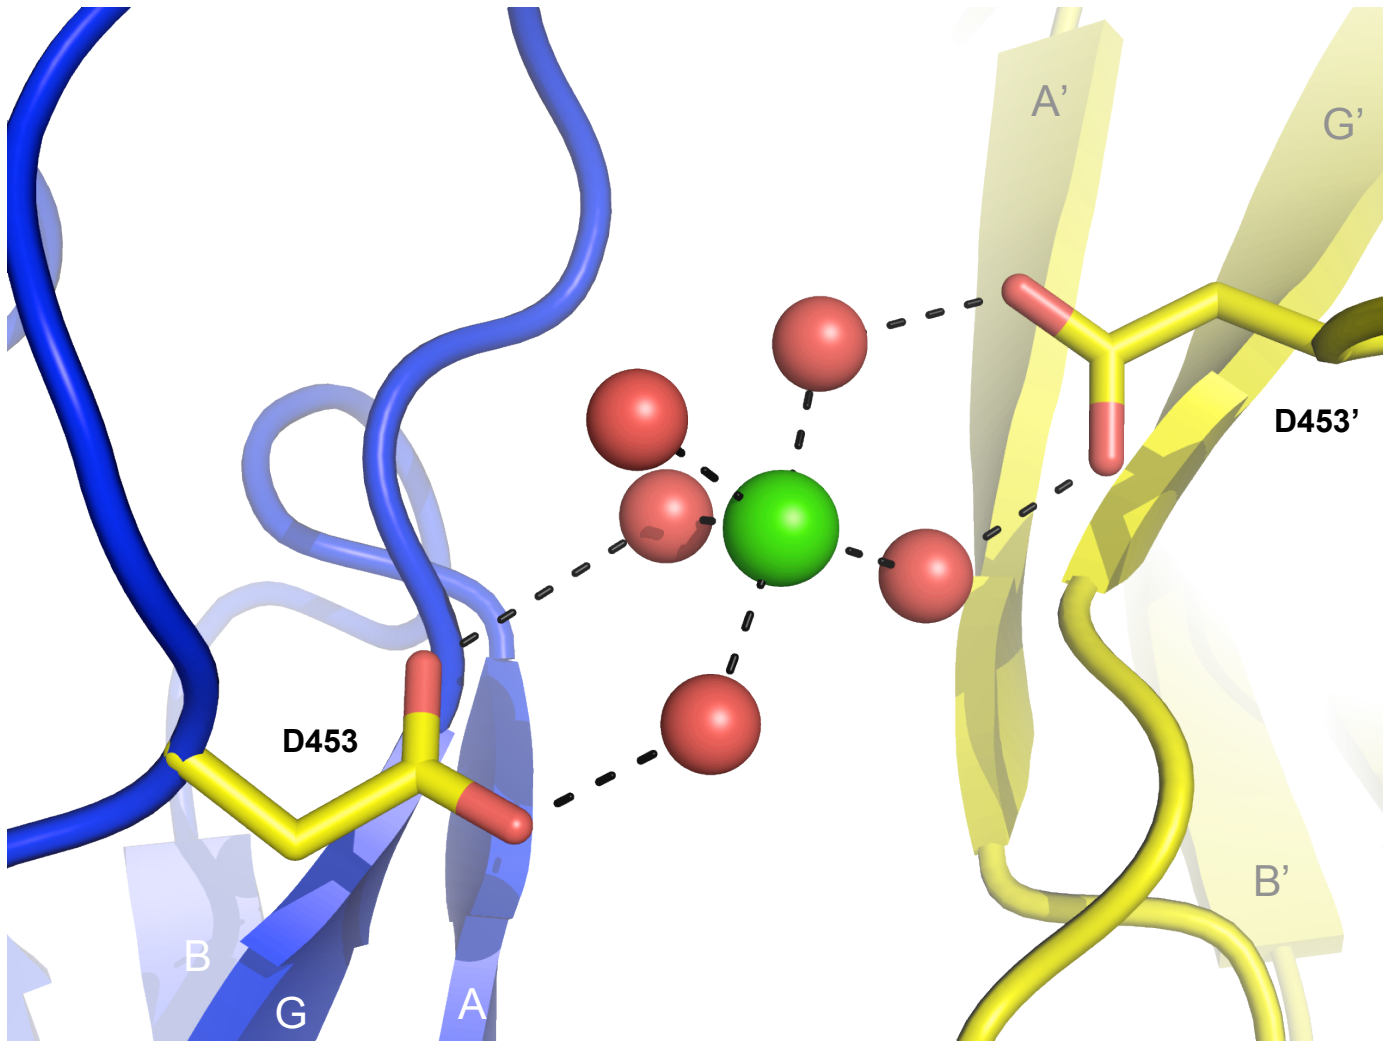

**Sfig2. Artfactual  $\text{Ca}^{2+}$  (green sphere) located at the crystal interface between two molecules of E454K-CBD1 (blue and yellow). The  $\text{Ca}^{2+}$  ion is coordinated by 5 water molecules (red spheres), 4 of which are coordinated symmetrically by D453 on adjacent subunits (displayed as sticks colored by  $\text{C}\alpha$ ).**
